# Supplementary material for: MoS2/carbon composites prepared by ball-milling and pyrolysis for the high-rate and stable anode of lithium ion capacitors
Source: Royal Society of Chemistry journal article supplement (doi:10.1039/c9ra09411c), 2019-01-01
Supplement: c9ra09411c1.pdf [file c9ra09411c1.pdf]

## Supporting Information for

### **MoS<sub>2</sub>/Carbon Composites Prepared by Ball-milling and Pyrolysis for the High-rate and Stable Anode of Lithium Ion Capacitors†**

Chong Wang<sup>a</sup>, Changzhen Zhan<sup>a</sup>, Xiaolong Ren<sup>a</sup>, Ruitao Lv<sup>a</sup>, Wanci Shen<sup>a</sup>, Feiyu Kang<sup>bc</sup> and Zheng-Hong Huang<sup>\*ab</sup>

*a. State Key Laboratory of New Ceramics and Fine Processing, School of Materials Science and Engineering, Tsinghua University, Beijing 100084, P. R. China.*

*E-mail: zhhuang@tsinghua.edu.cn (Z.-H Huang)*

*b. Key Laboratory of Advanced Materials (MOE), School of Materials Science and Engineering, Tsinghua University, Beijing 100084, China*

*c. Engineering Laboratory for Functionalized Carbon Materials, Graduate School at Shenzhen, Tsinghua University, Shenzhen 518055, P. R. China.*

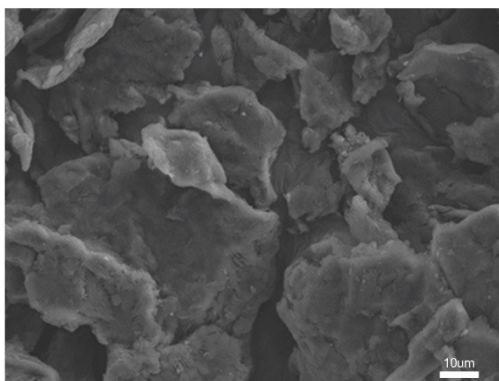

**Fig. S1** SEM image of chitosan.

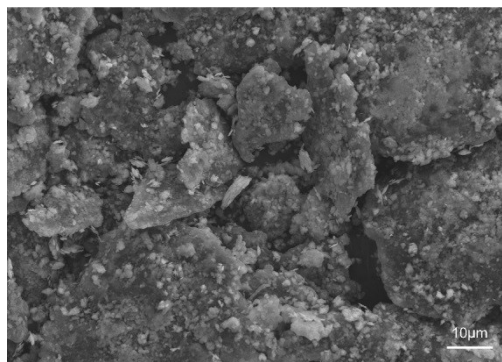

**Fig. S2** SEM image of cg-MoS<sub>2</sub>.

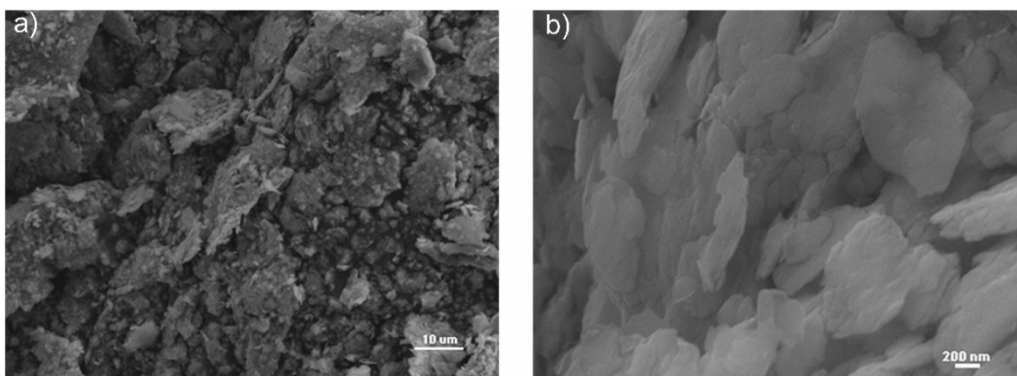

**Fig. S3** SEM images of MoS<sub>2</sub>/C.

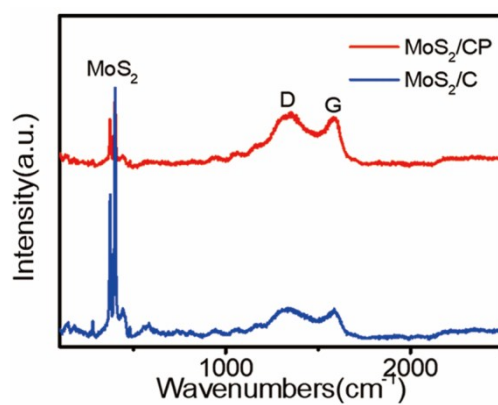

**Fig. S4** Raman image of MoS<sub>2</sub>/C and MoS<sub>2</sub>/CP.

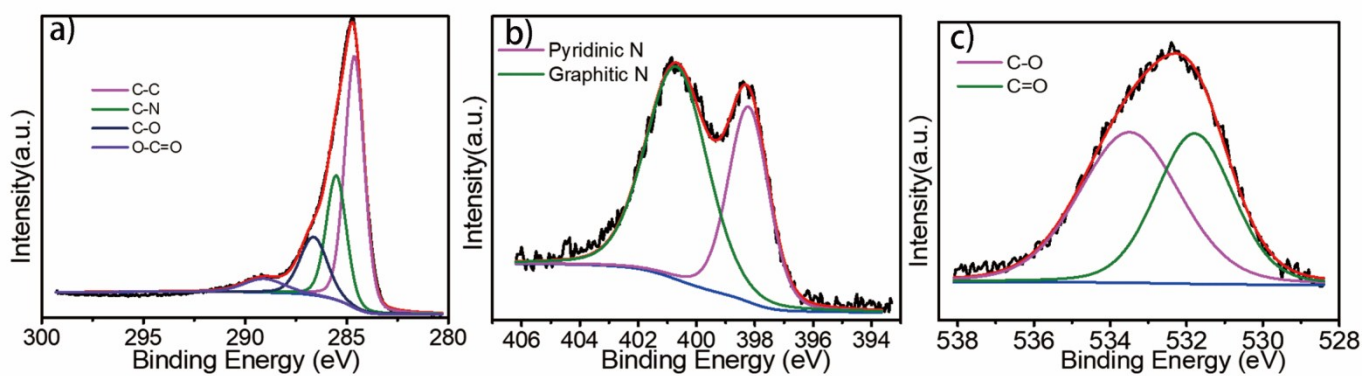

**Fig. S5** XPS images of nitrogen-doped carbon matrix derived from chitosan: (a) C 1s, (b) N 1s, (c) O 1s.

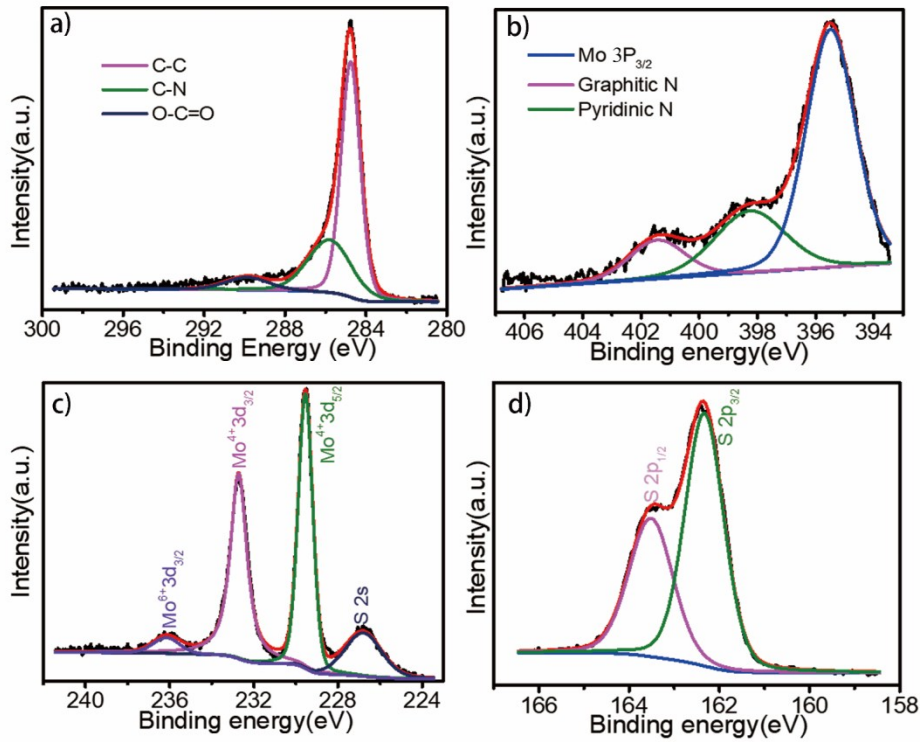

Fig. S6 XPS images of MoS<sub>2</sub>/C: (a) C 1s, (b) N 1s, (c) Mo 3d, (d) S 2p.

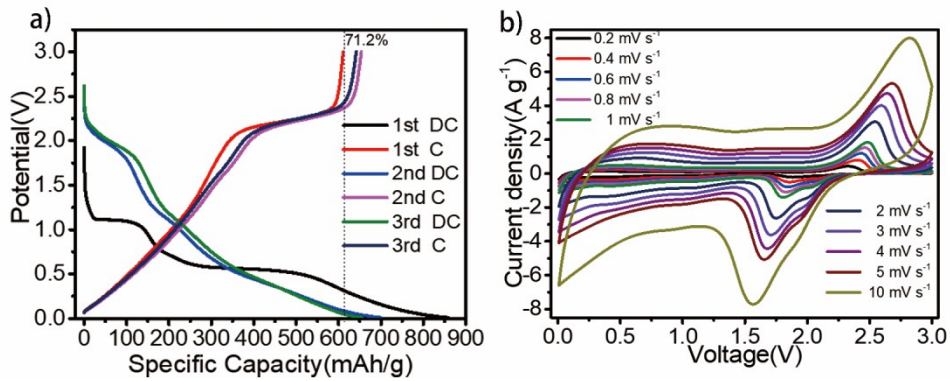

Fig. S7 GCD curves of MoS<sub>2</sub>/C in the first 3 cycles at 1 A g<sup>-1</sup> and CV curves at various scan rates.

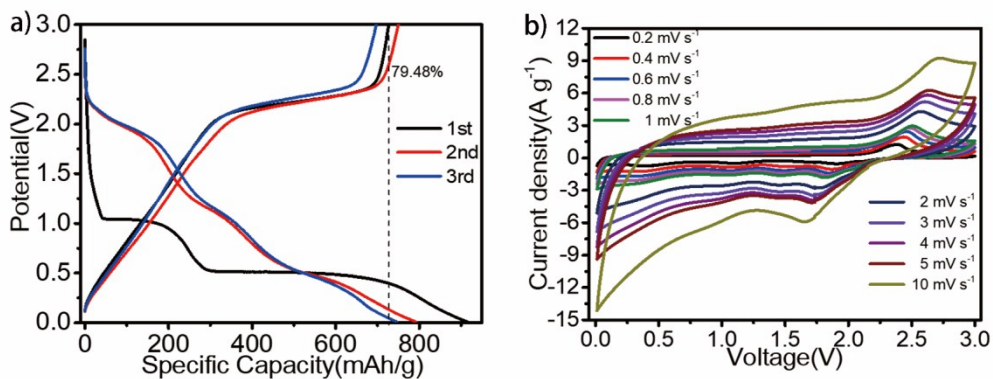

**Fig. S8** GCD curves of bulk MoS<sub>2</sub> in the first 3 cycles at 1 A g<sup>-1</sup> and CV curves at various scan rates.

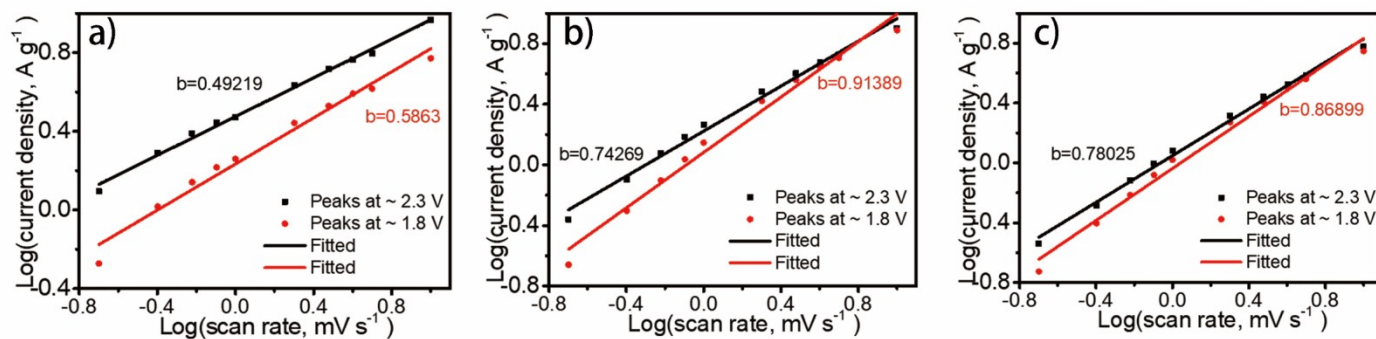

**Fig. S9** Plots of logarithm peak current density and logarithm scan rate. (a) bulk MoS<sub>2</sub>, (b) MoS<sub>2</sub>/C, (c) MoS<sub>2</sub>/CP.

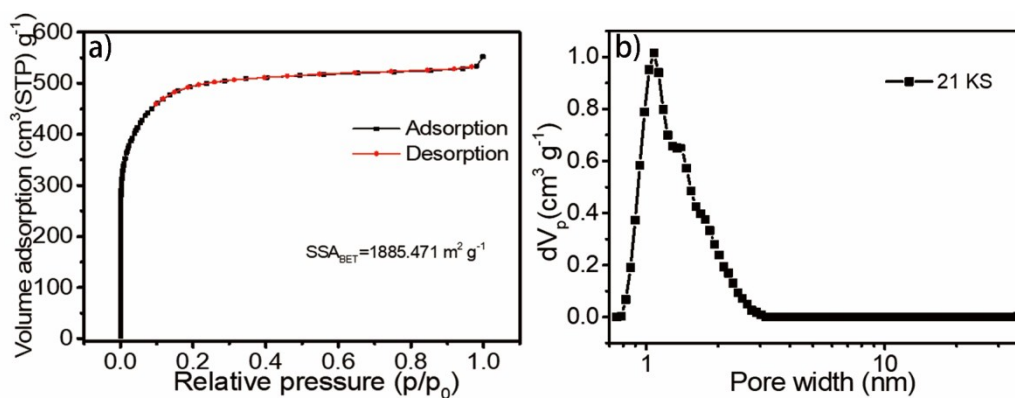

**Fig. S10** N<sub>2</sub> adsorption/desorption isotherms and pore size distribution of 21KS.

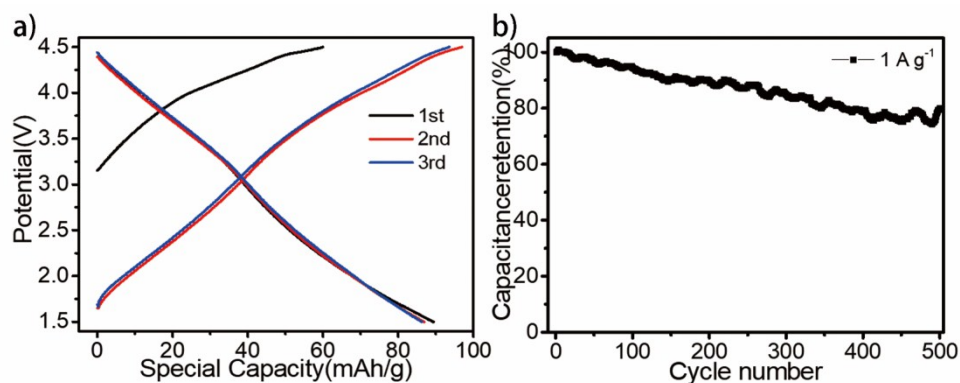

**Fig. S11** The first 3 charge-discharge curves and cycle performance of 21 KS.

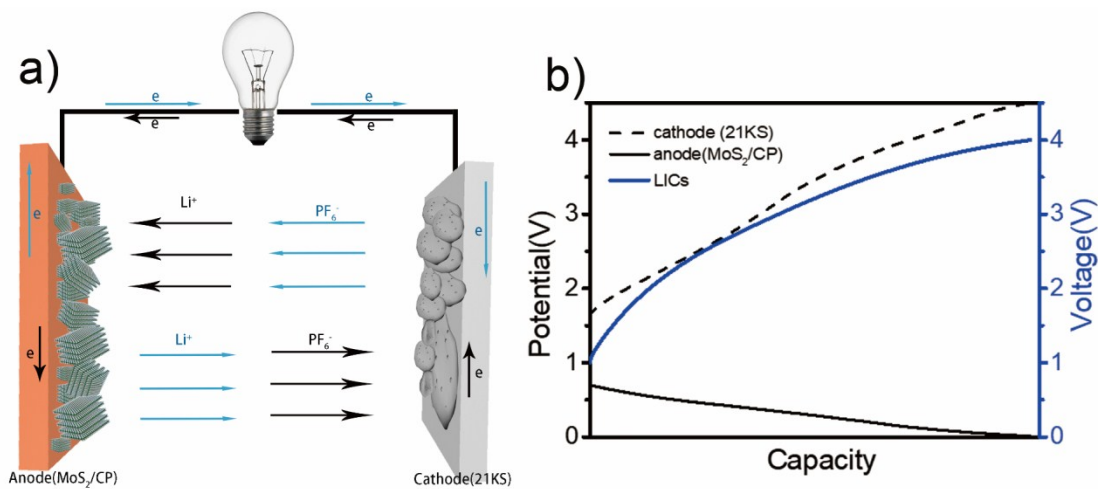

**Fig. S12** The configuration graph (a) and potential distribution curves (b) of LICs.

| Sample               | Mo at% | S at% | C at% | N at% | O at% |
|----------------------|--------|-------|-------|-------|-------|
| Carbon matrix        | \      | \     | 83.61 | 7.53  | 8.86  |
| MoS <sub>2</sub> /C  | 6.5    | 13.12 | 65.4  | 6.19  | 8.76  |
| MoS <sub>2</sub> /CP | 6.06   | 12.79 | 65.8  | 6.13  | 9.17  |

**Table S1.** The element content of carbon matrix, MoS<sub>2</sub>/C and MoS<sub>2</sub>/CP.
